# Supplementary material
Source: publisher figshare collection journal article supplement (https://acs.figshare.com/ndownloader/files/4123291)

## Supporting Information

### Synthesis of Ionic Liquid-supported Sulfonyl Azide and its Application in Diazotransfer Reaction

**Manoj Kumar Muthyala, Sunita Choudhary and Anil Kumar\***

*Department of Chemistry, Birla Institute of Technology and Science, Pilani-333 031, Rajasthan, India.*

*Fax: 91 1596 244183; Tel: 91 1596 515514; E-mail: [anilkumar@bits-pilani.ac.in](mailto:anilkumar@bits-pilani.ac.in)*

#### Content

- |                                                                                         |        |
|-----------------------------------------------------------------------------------------|--------|
| 1. General                                                                              | S2     |
| 2. Copy of $^1\text{H}$ NMR and $^{13}\text{C}$ NMR spectra of <b>5</b> and <b>8a-p</b> | S3-S19 |

## *1. General*

NMR spectra were recorded on 400 MHz and 500 MHz spectrometers using CDCl<sub>3</sub> and DMSO-*d*<sub>6</sub> as solvents. The chemical shifts were expressed in ppm. The purity of the products was determined on silica-coated aluminum plates. The mass spectra were recorded on qTOF mass spectrometer in ESI mode. IR spectra were recorded with KBr. Melting points were determined on open capillary tube and are uncorrected. 1-Methylimidazole, trifluoromethanesulfonic acids, other reagents and solvents were purchased from commercial sources and used without further purification unless otherwise specified.

2. Copy of  $^1\text{H}$  NMR and  $^{13}\text{C}$  NMR spectra of 11 and 14a-p

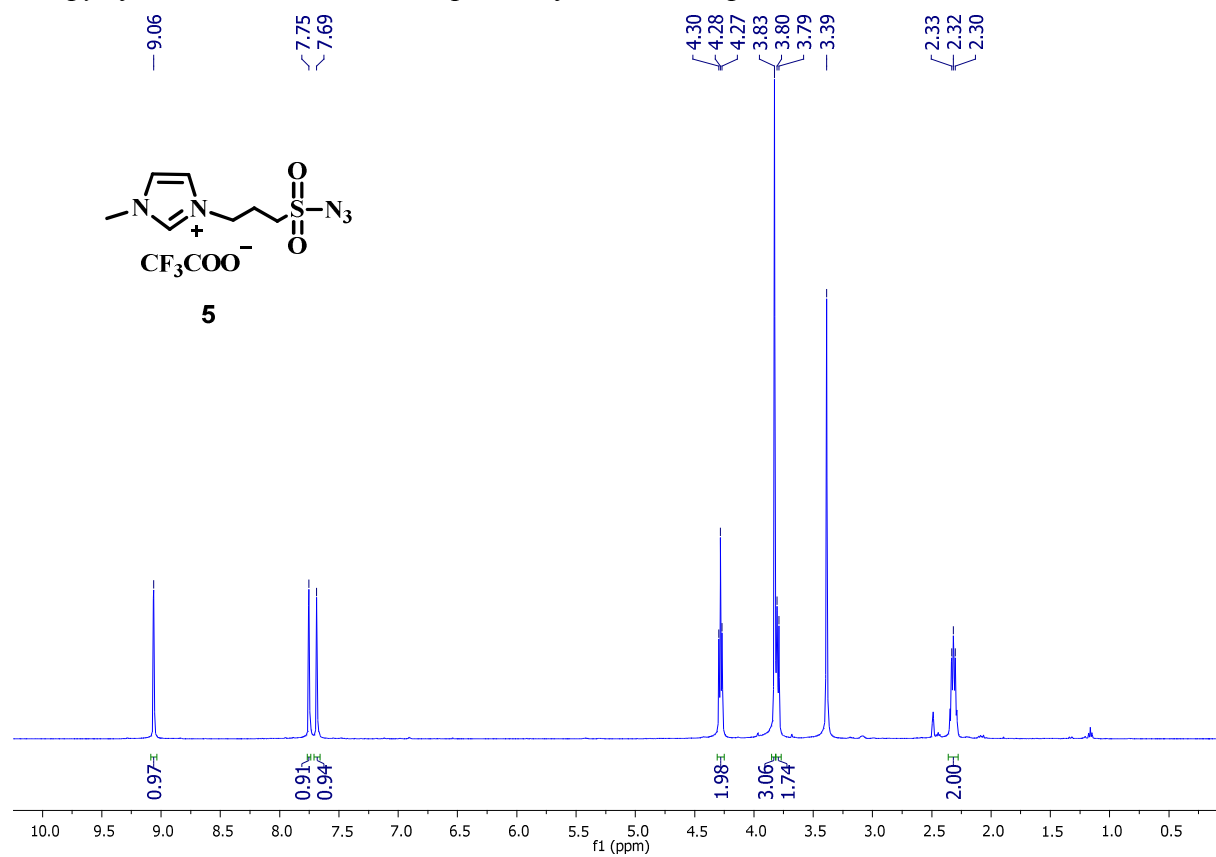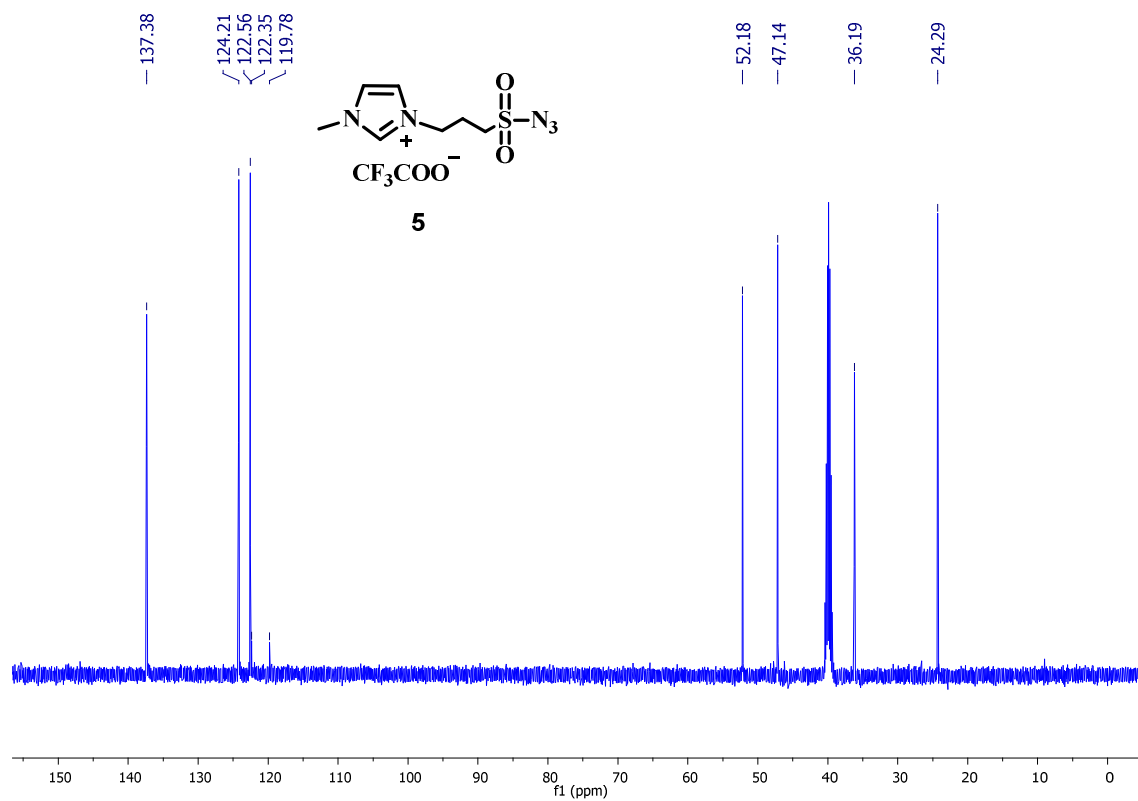

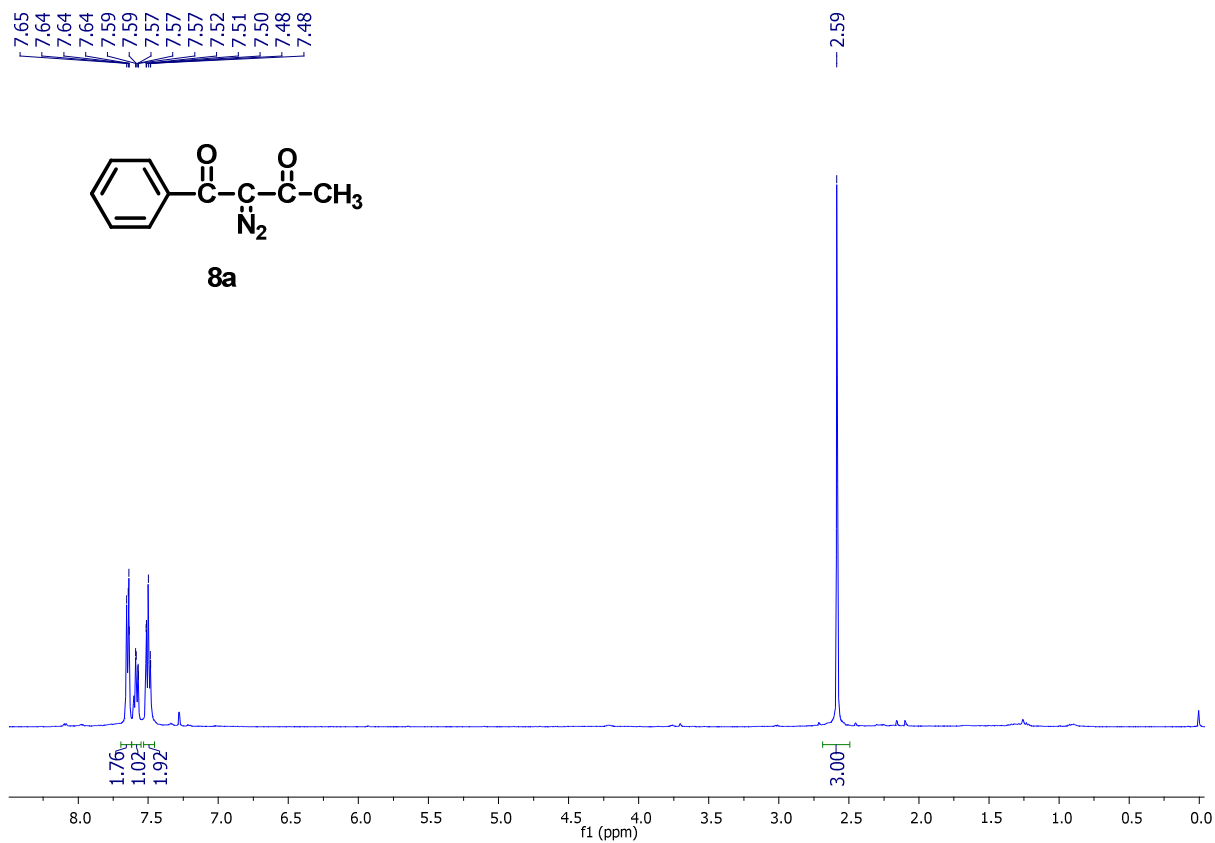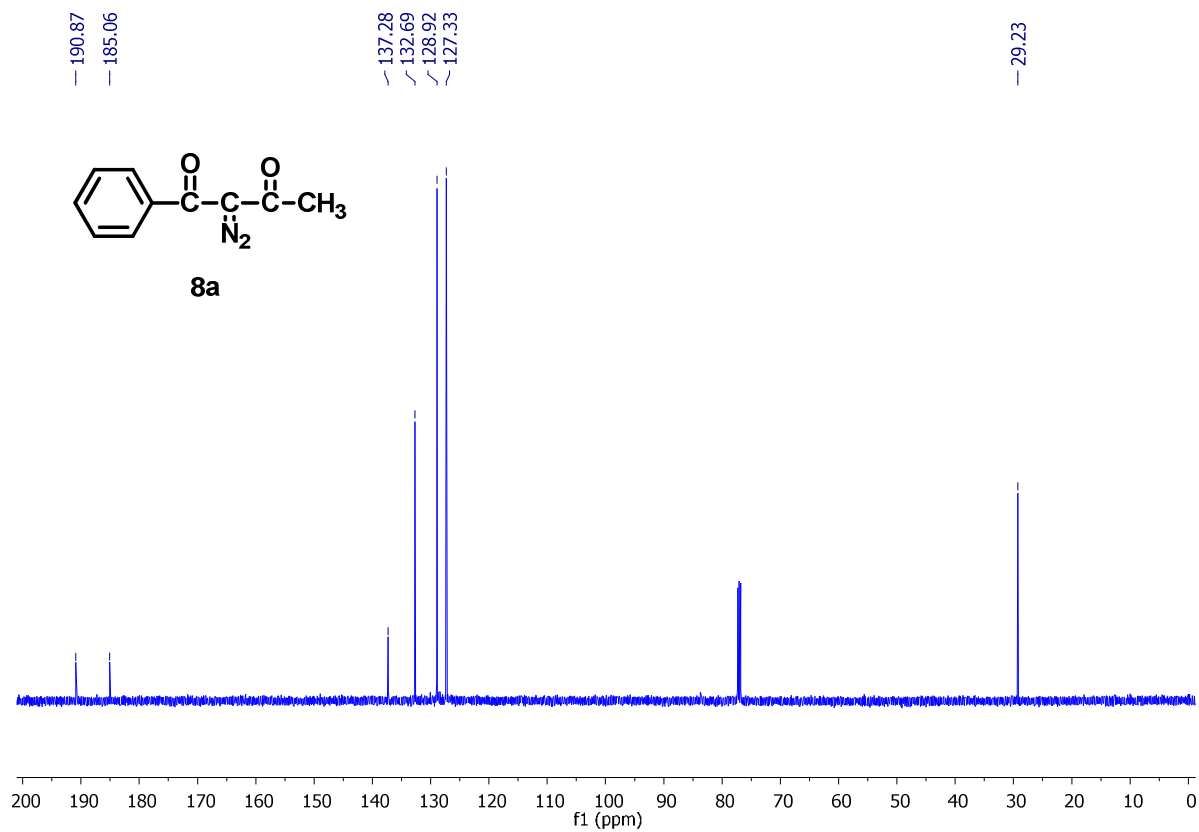

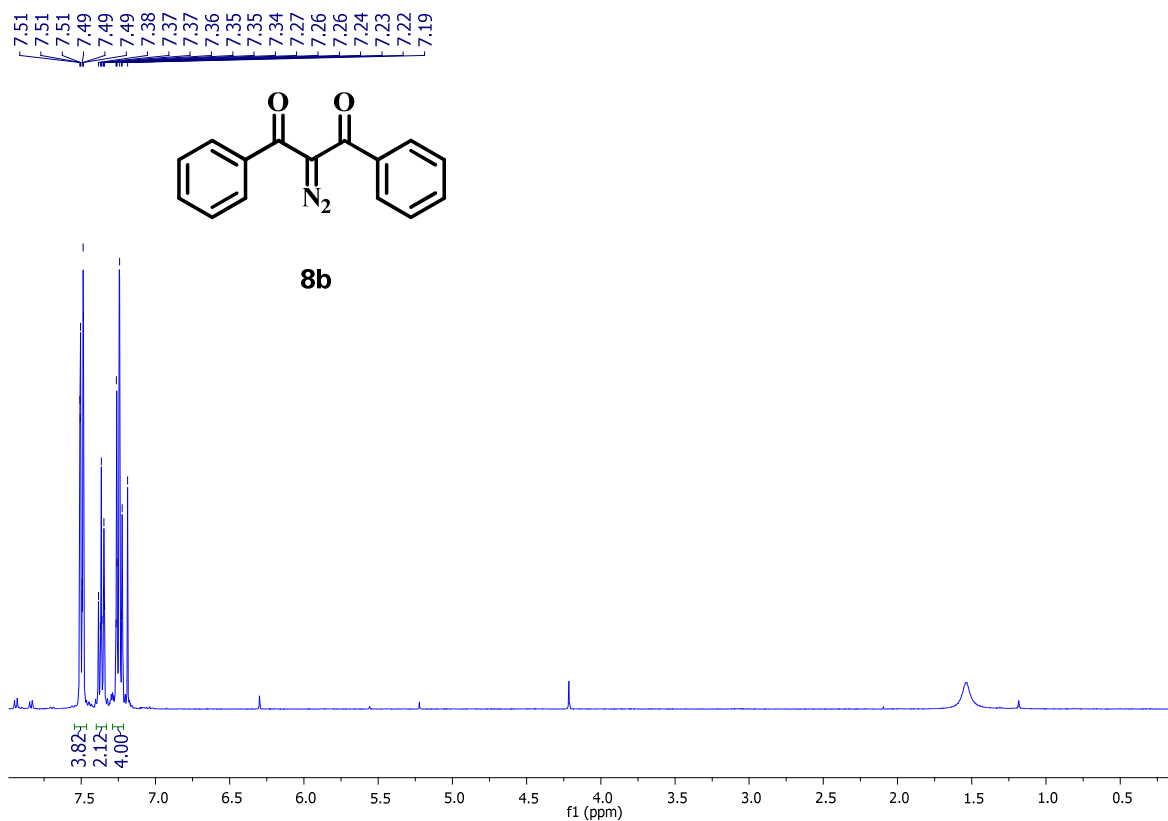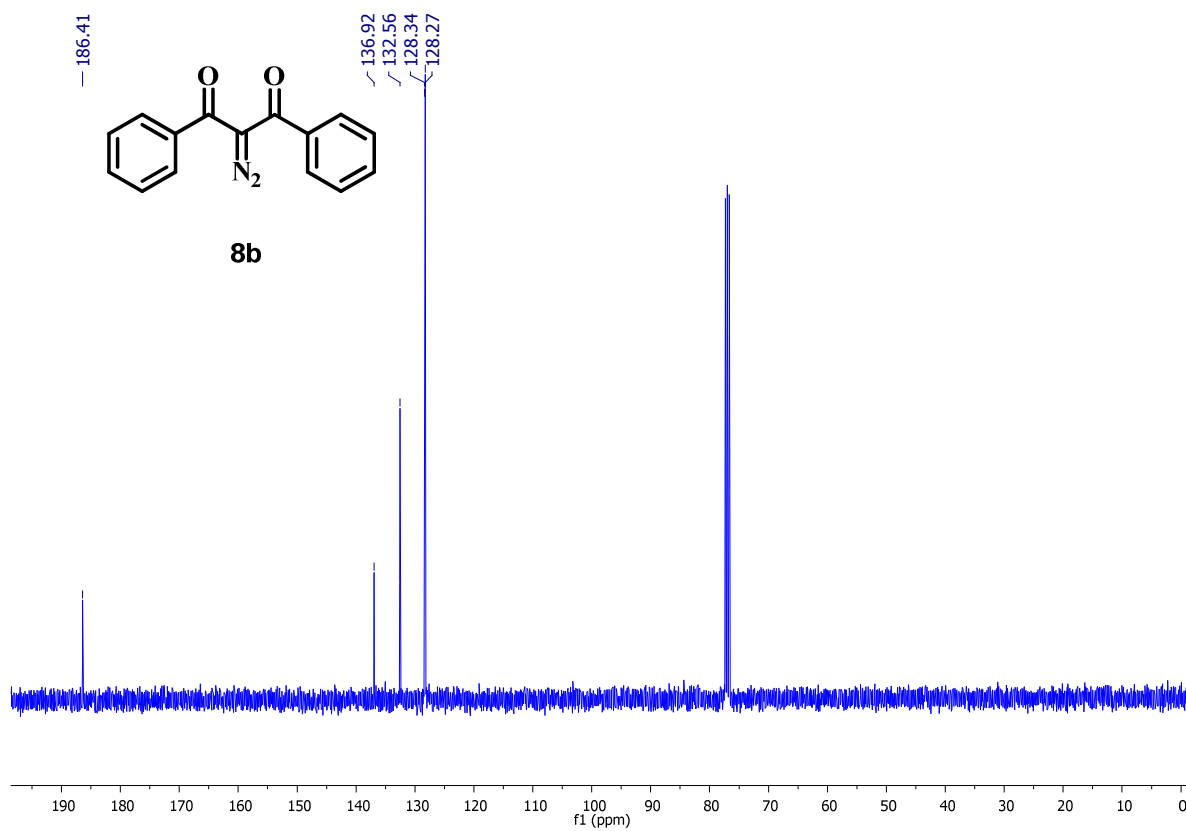

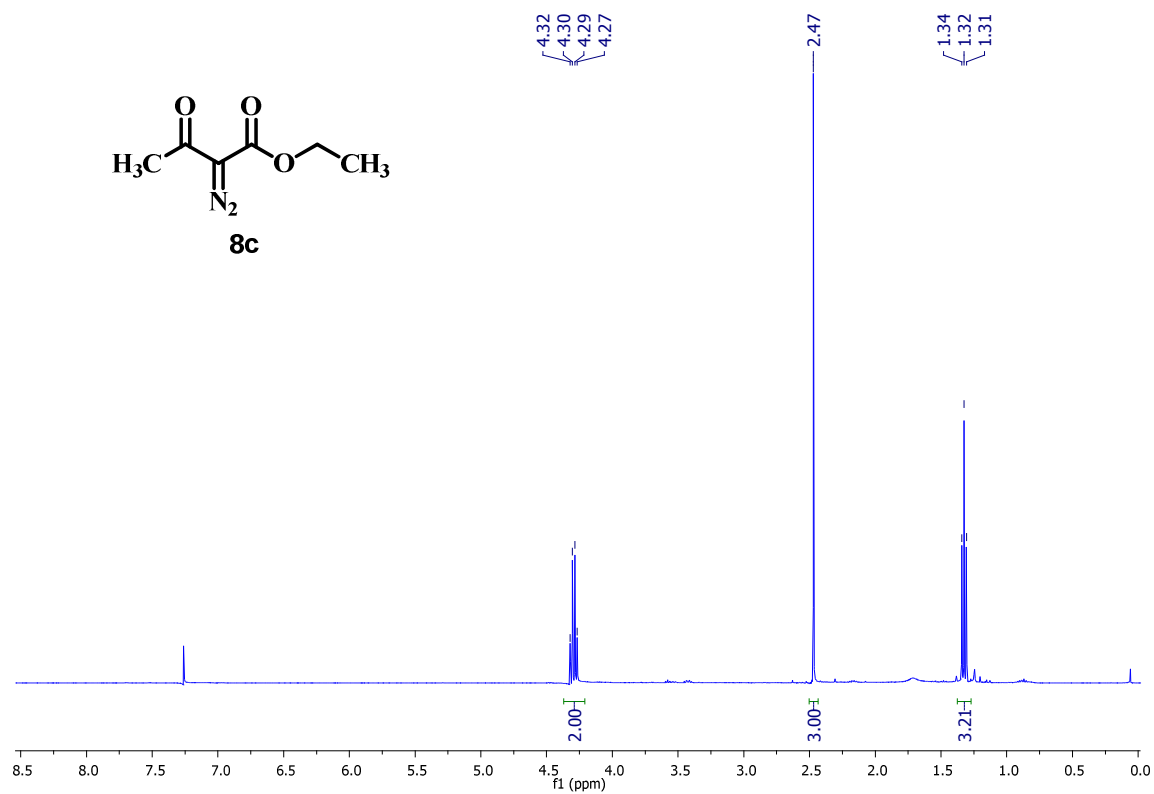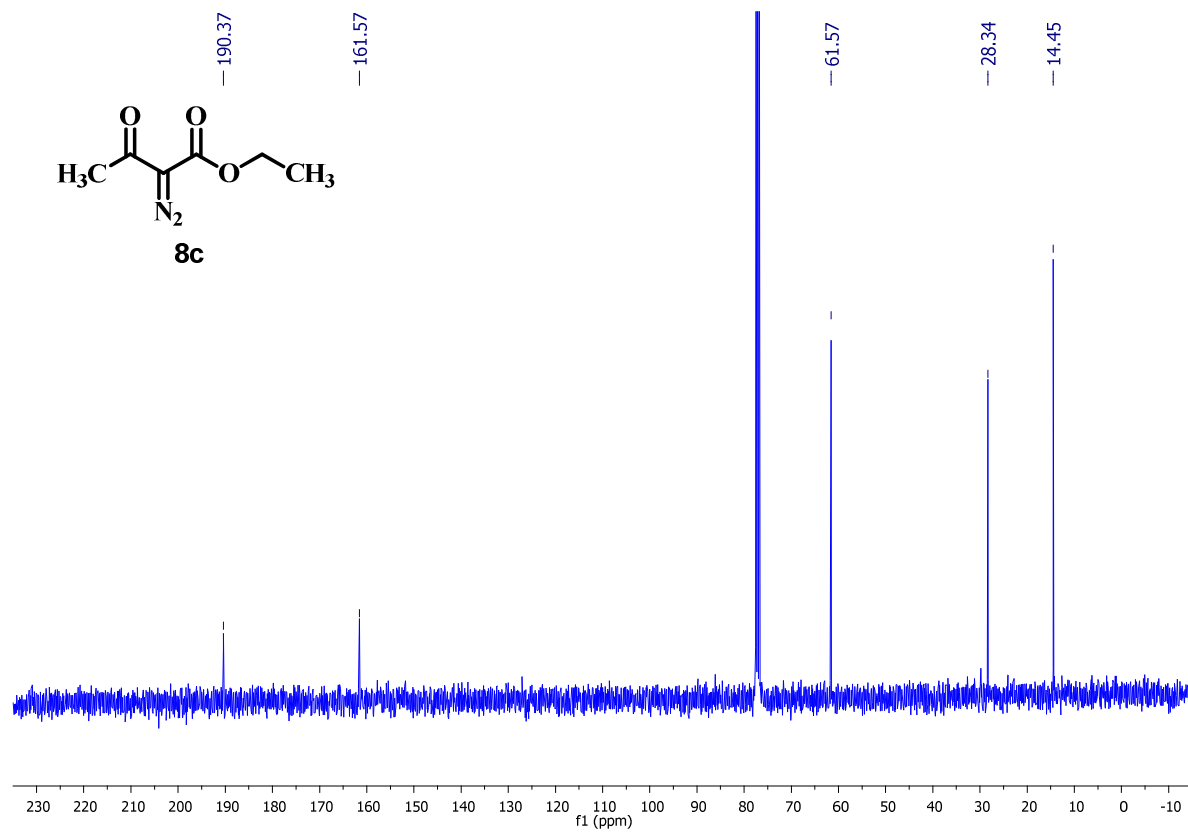

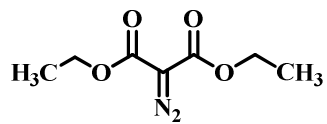

8d

4.32  
4.30  
4.29  
4.27

1.33  
1.31  
1.29

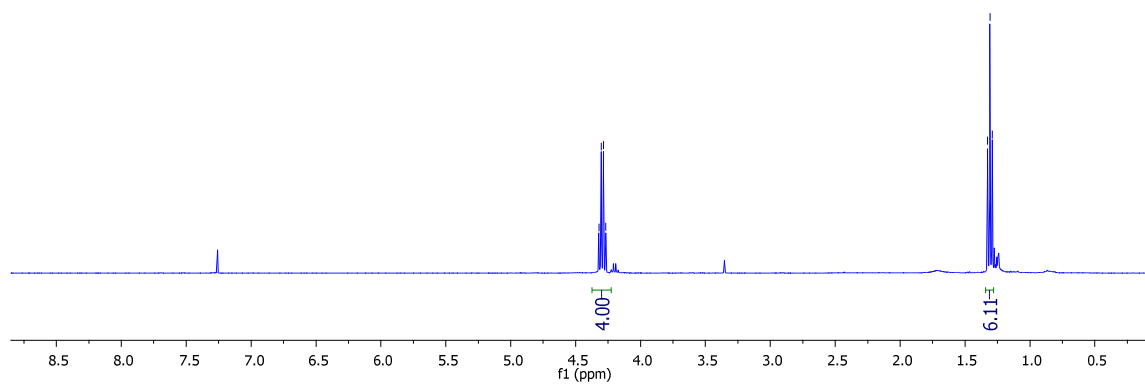

— 161.23

— 61.75

— 14.46

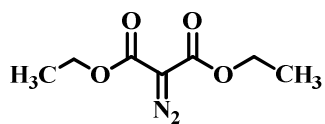

8d

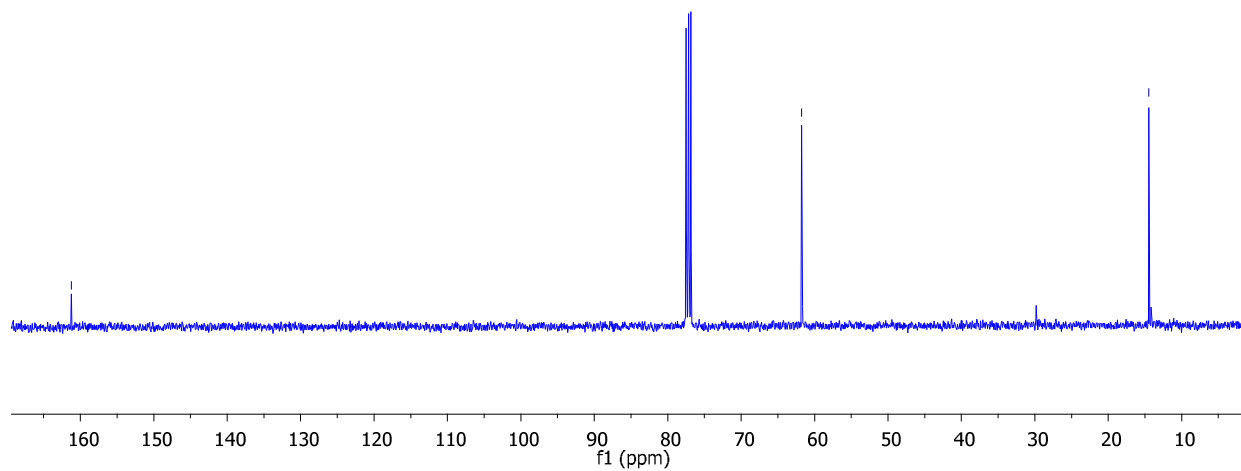

Jan10-2012  
MMK-2-350

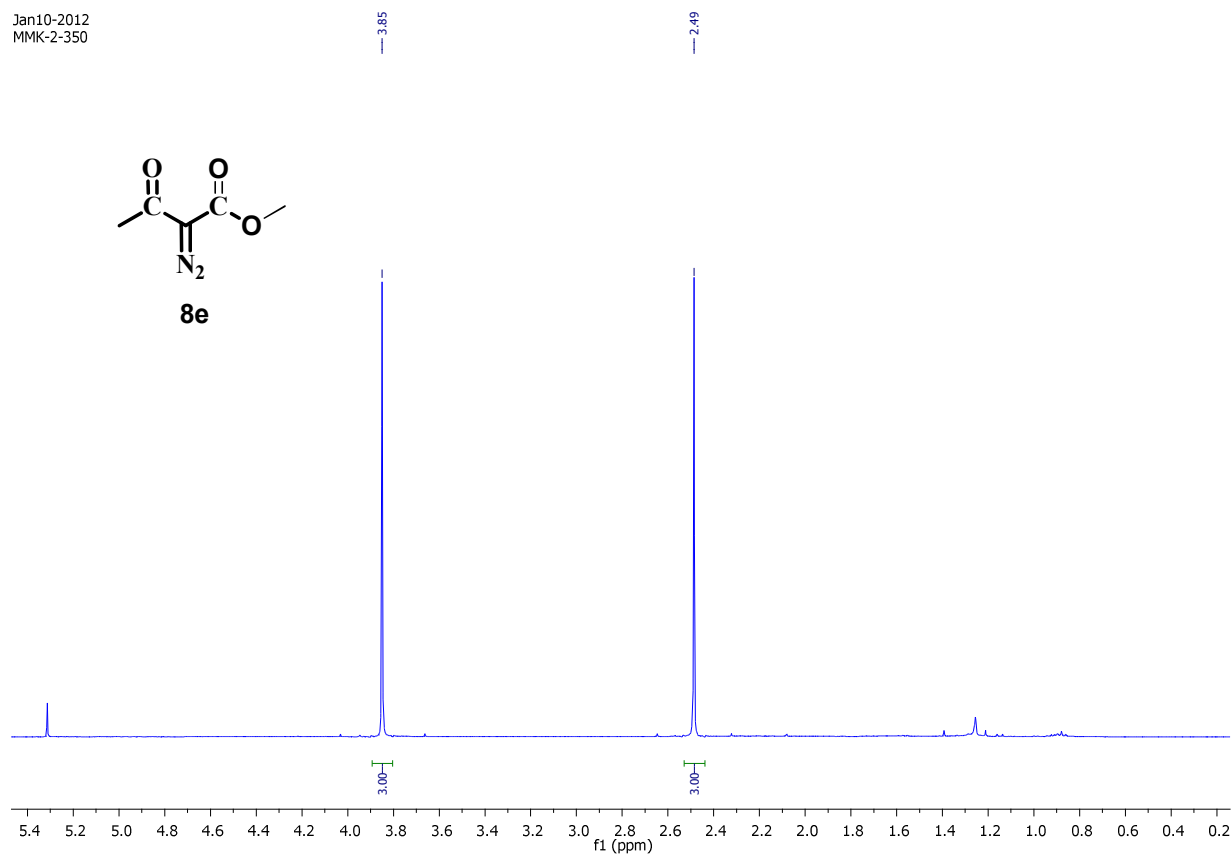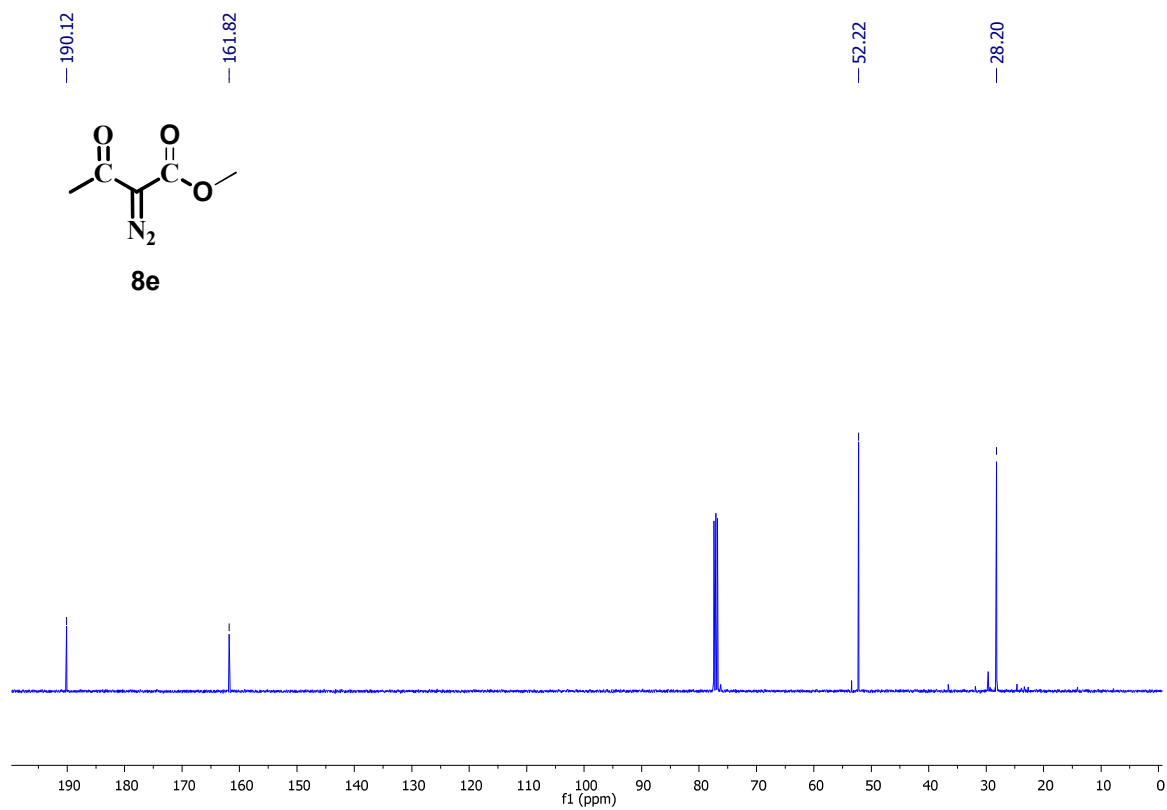



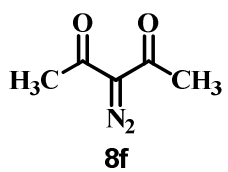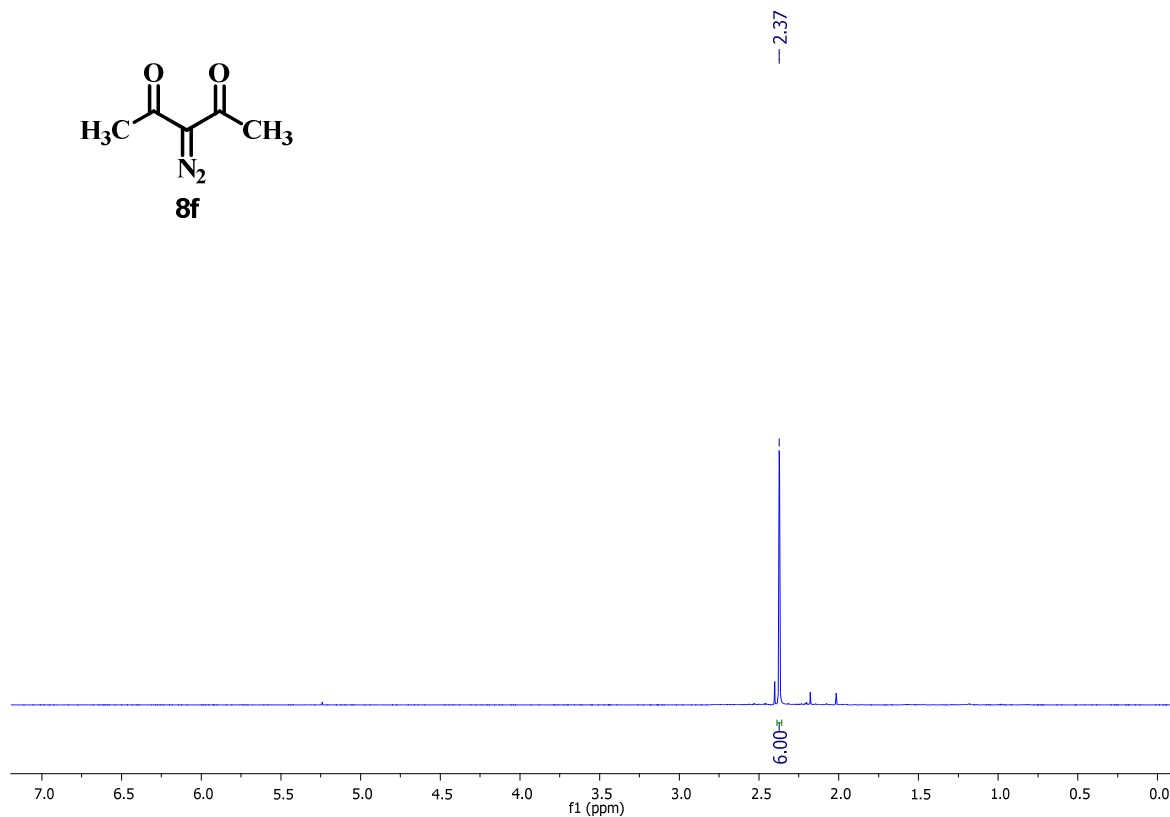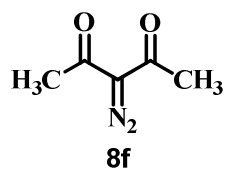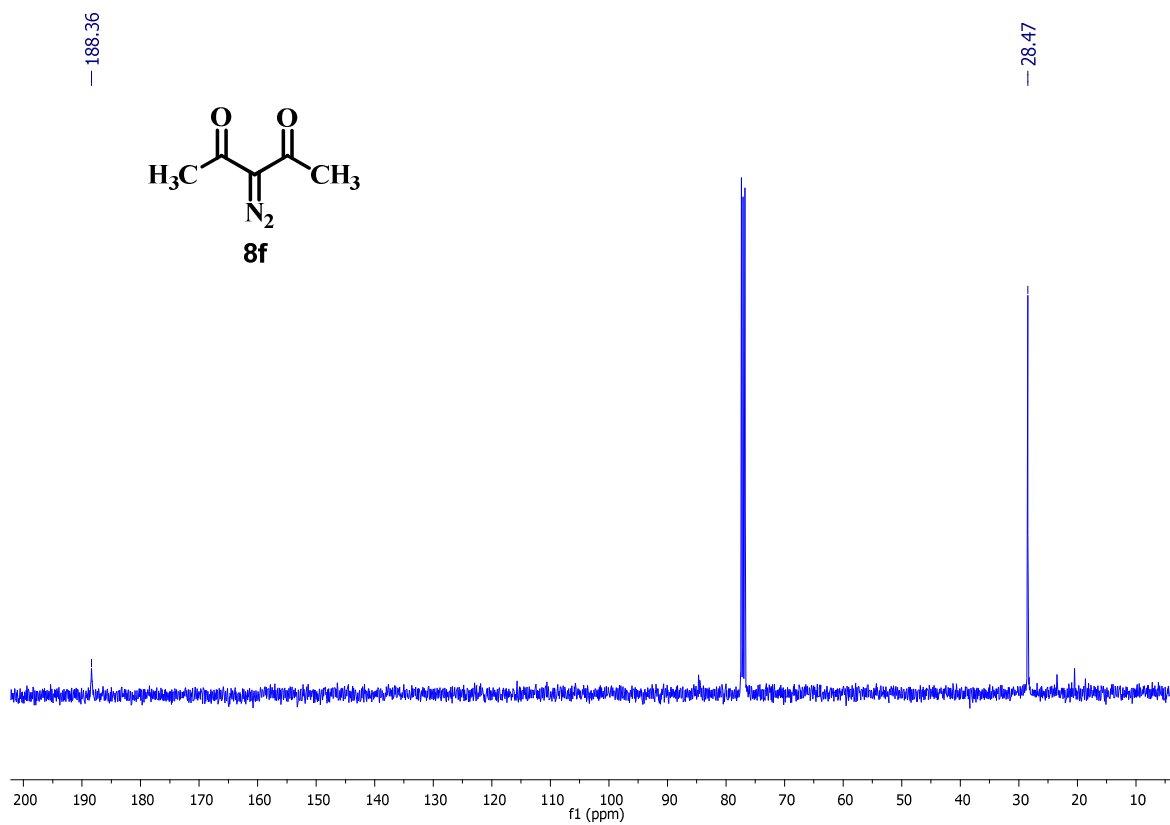

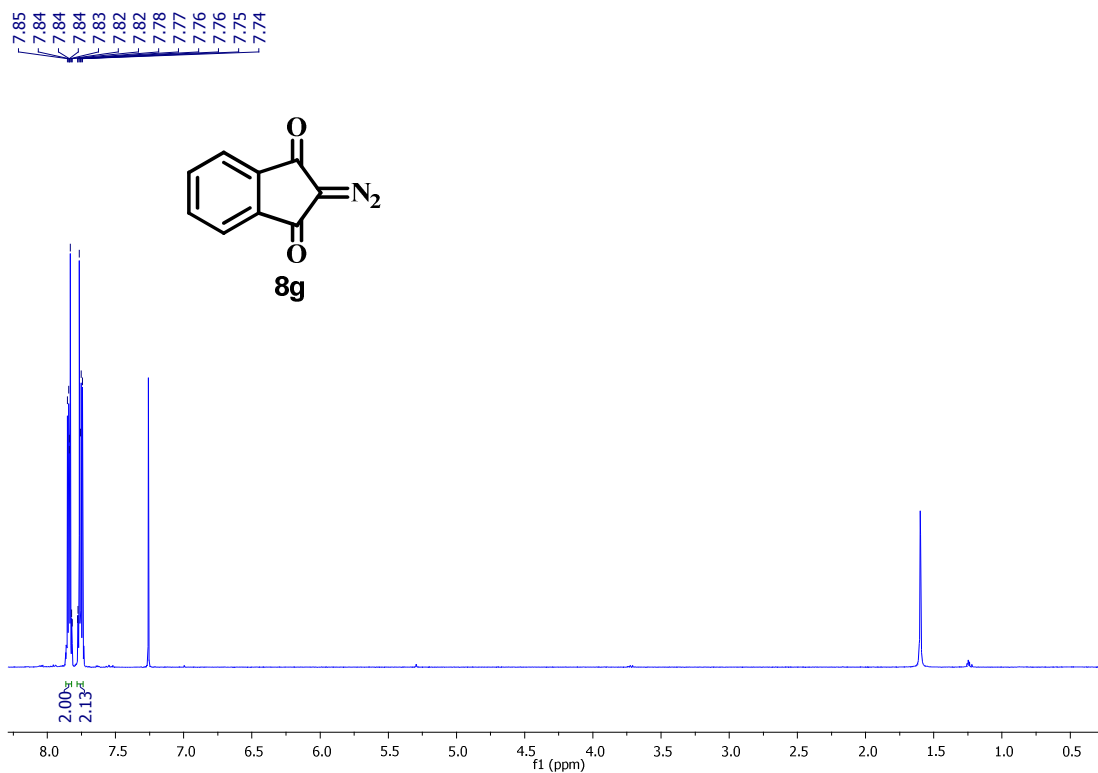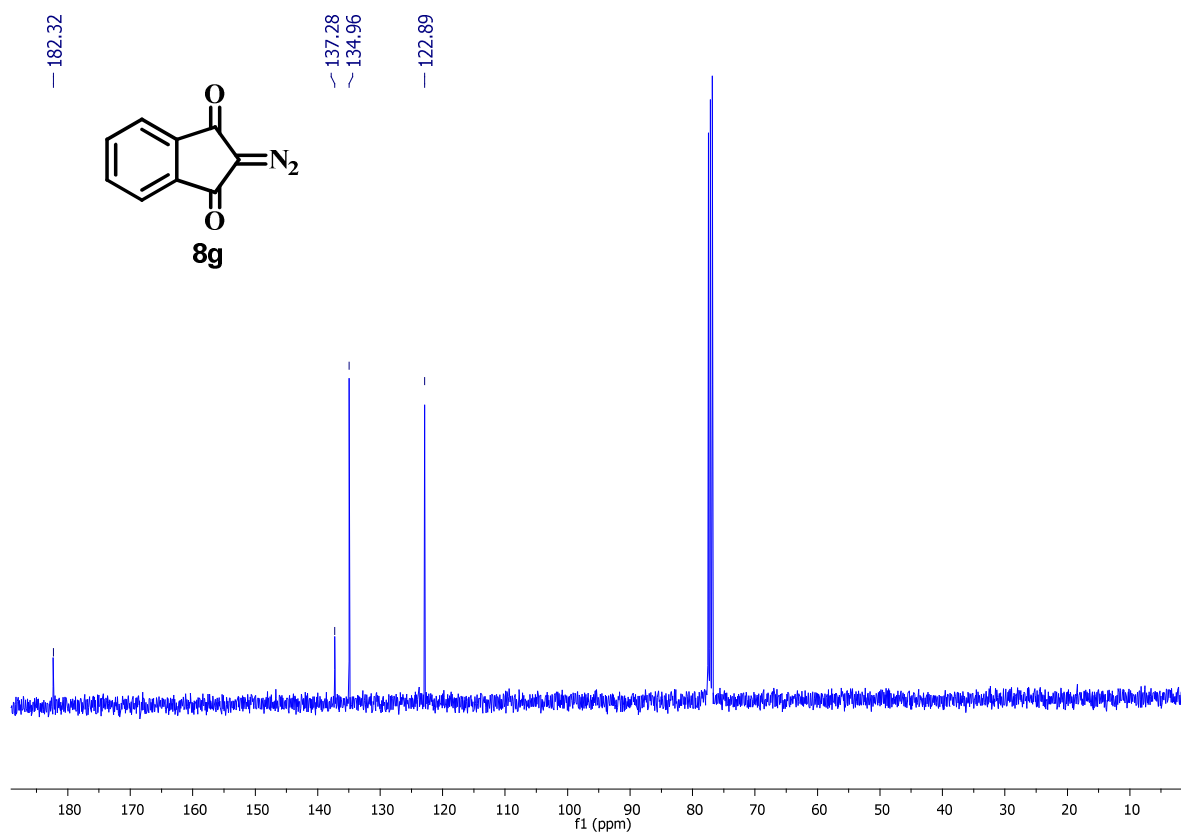

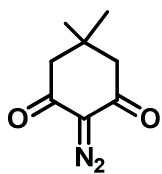

8h

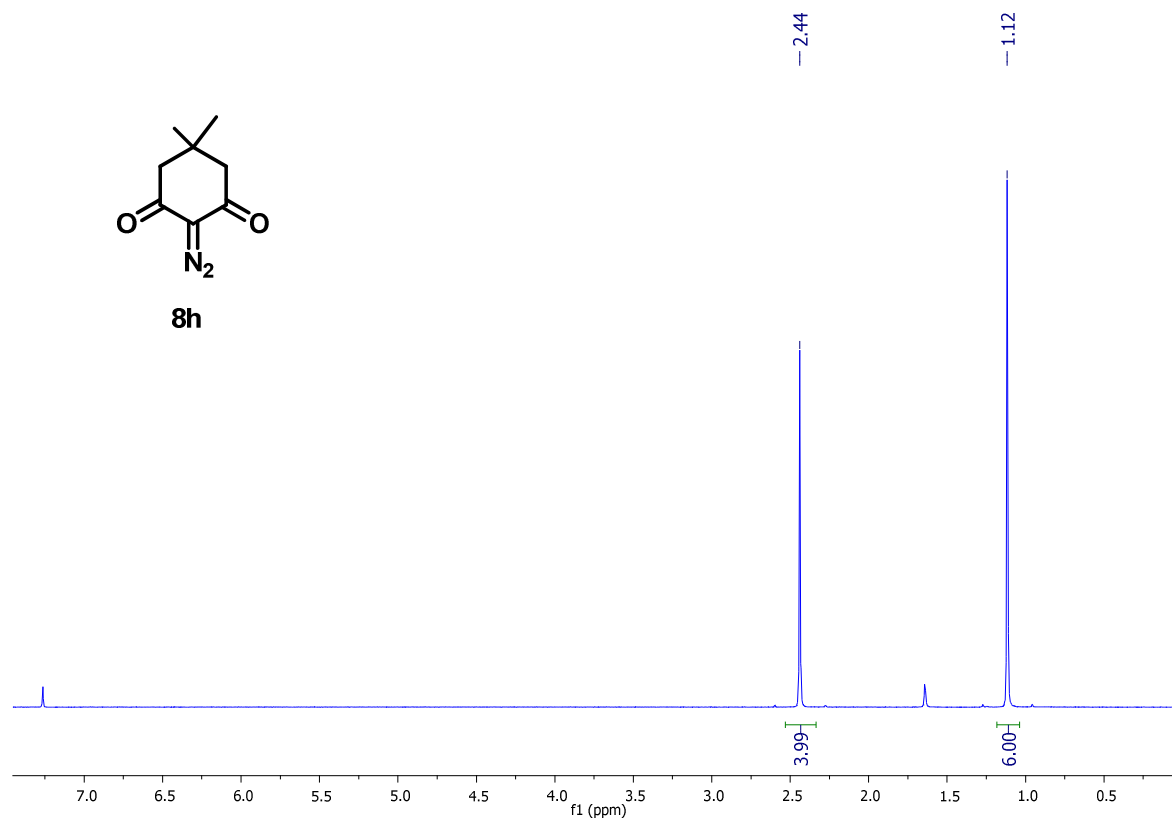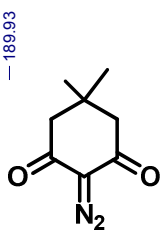

8h

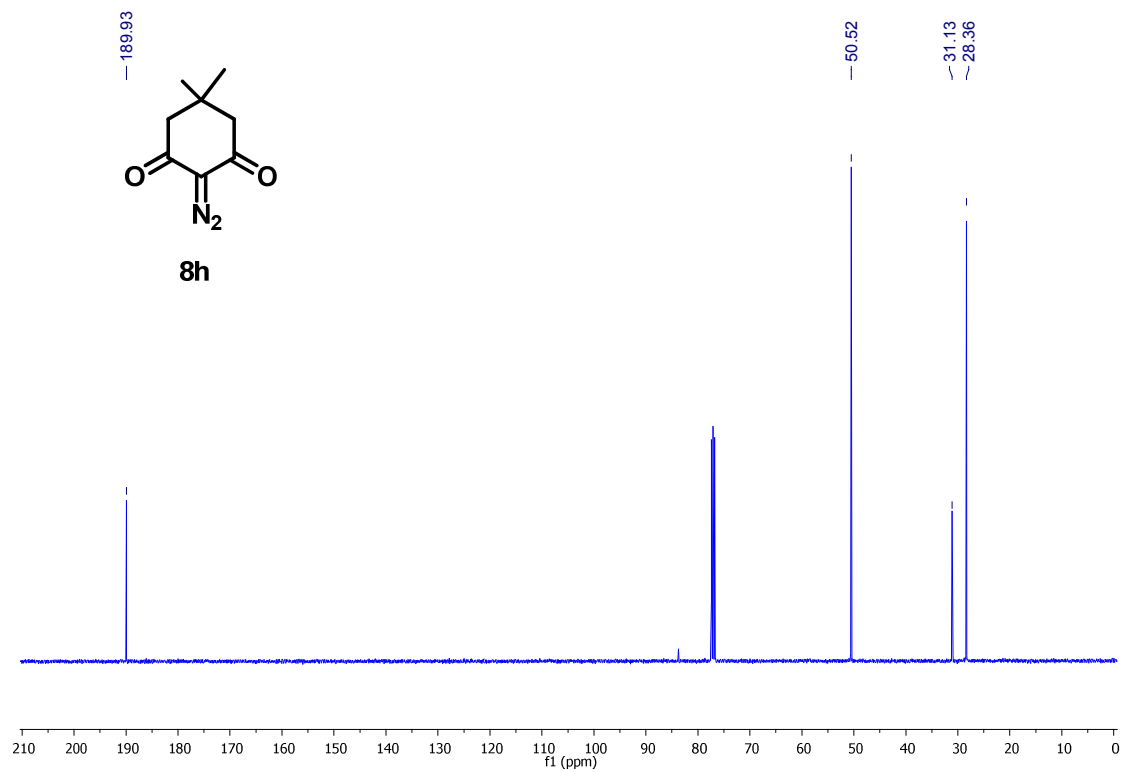

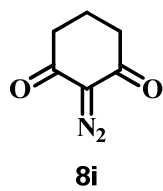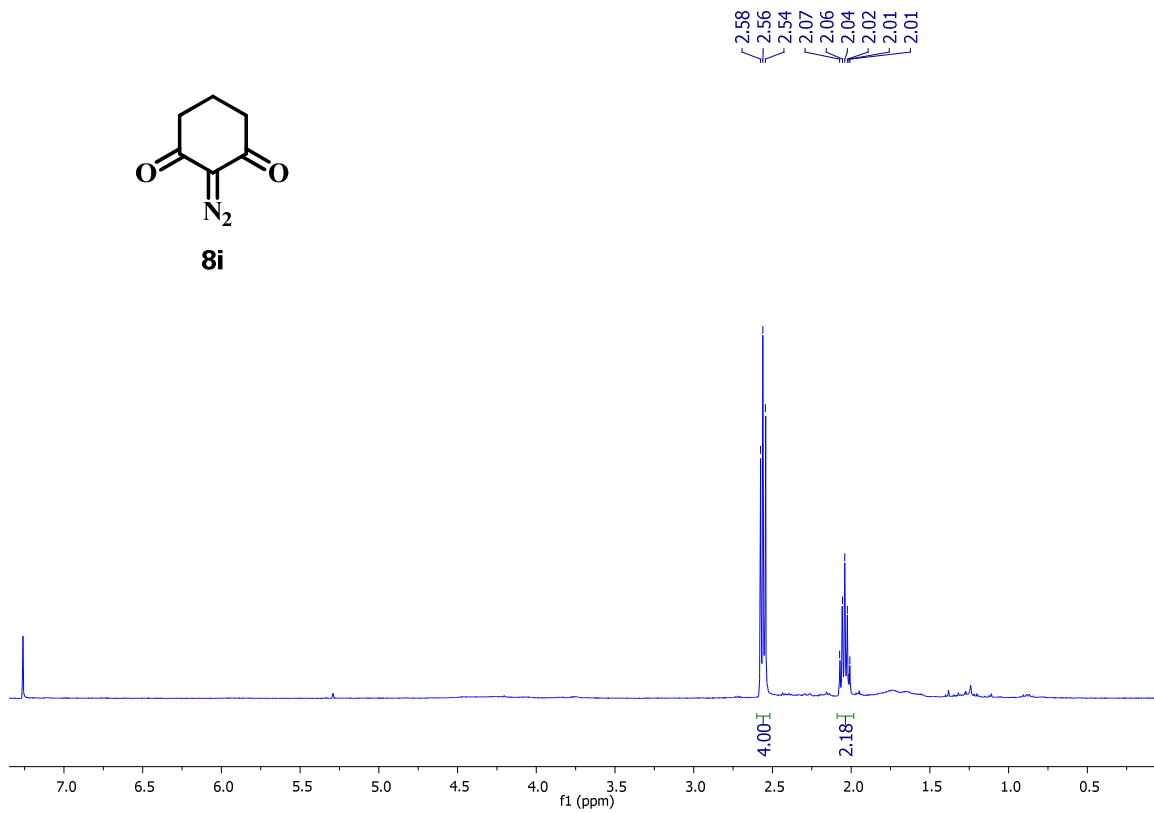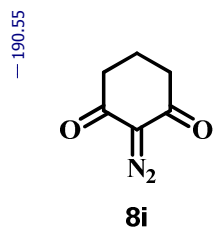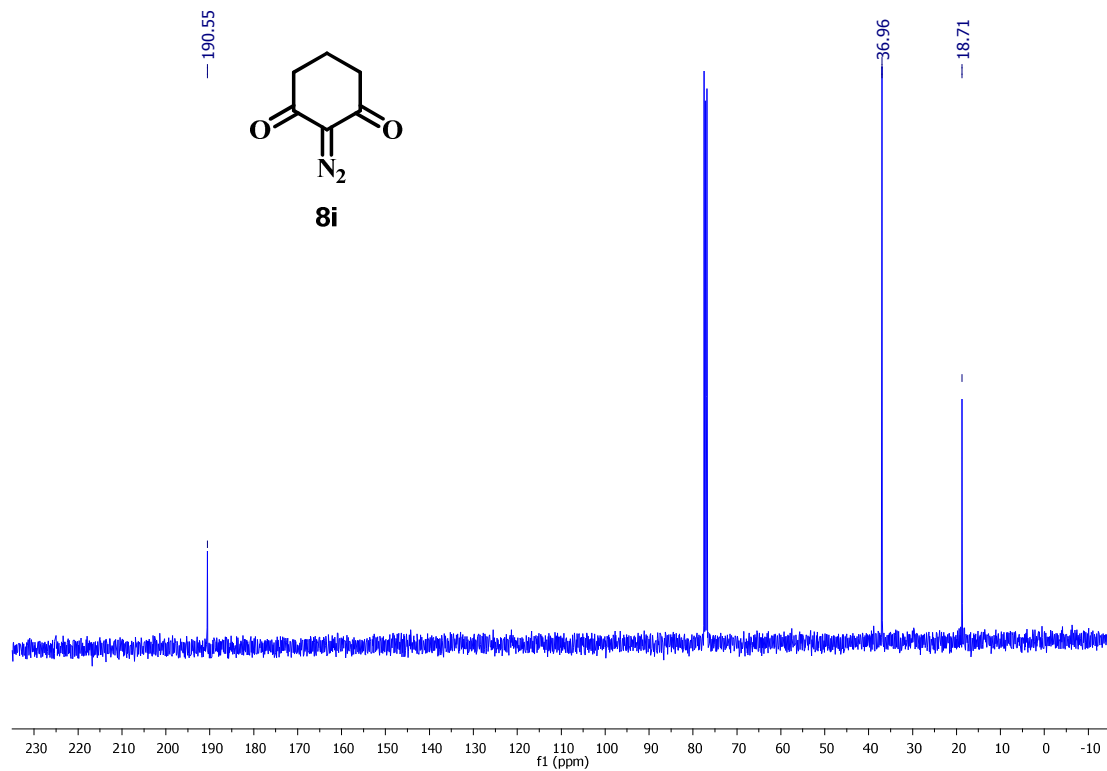

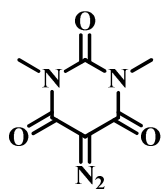

8j

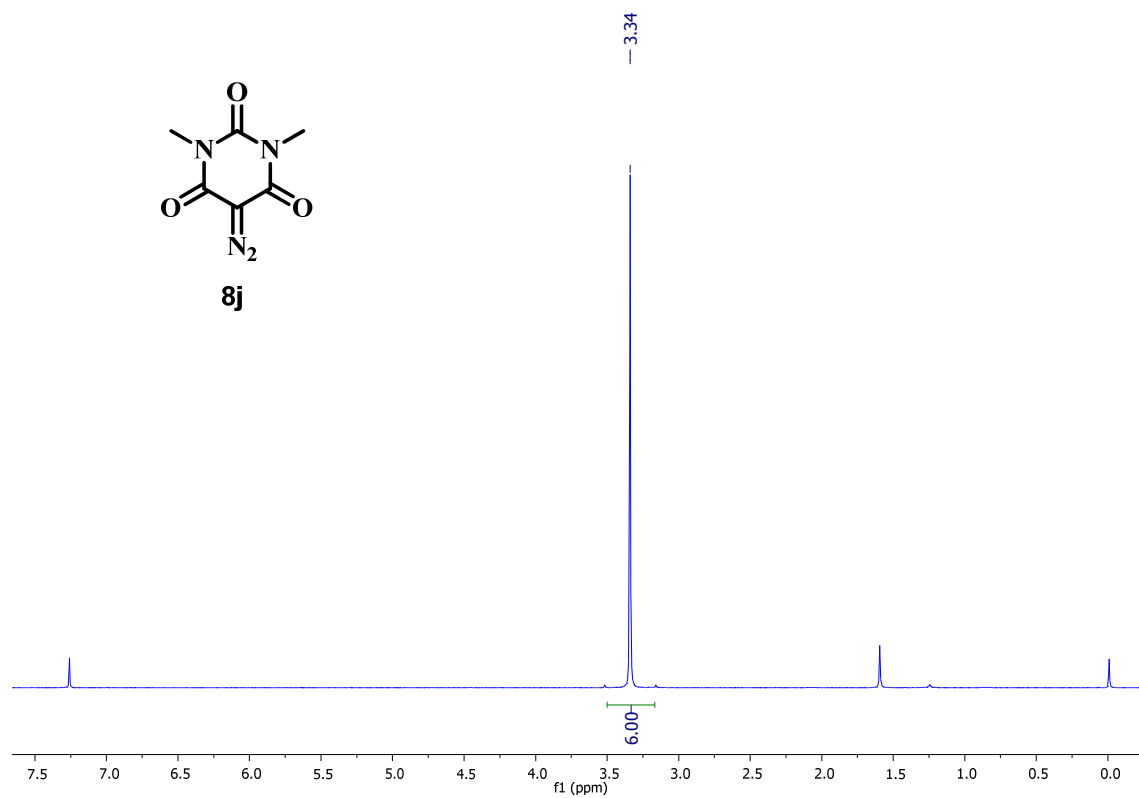

Jan10-2012  
MMK-2-334

— 158.19

— 150.50

— 28.59

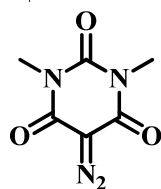

8j

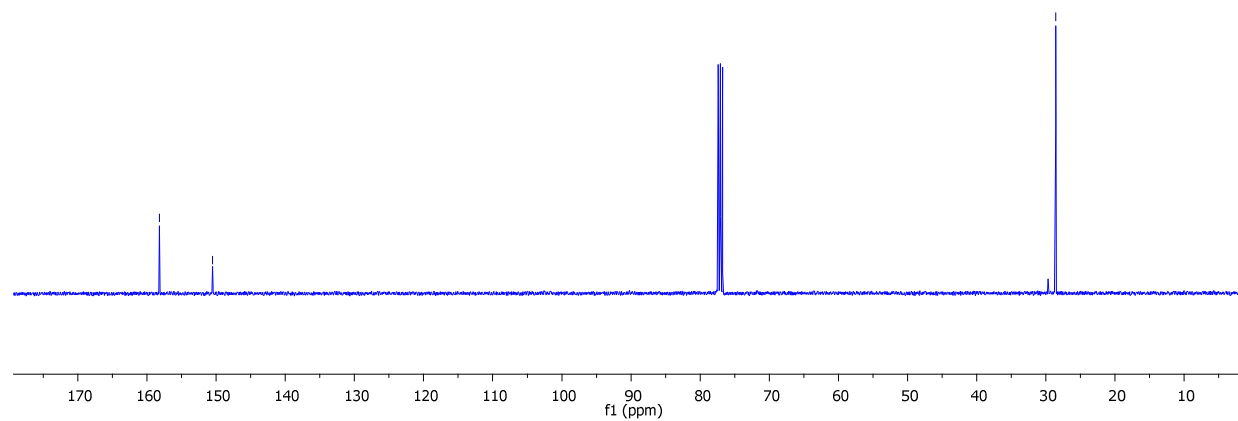

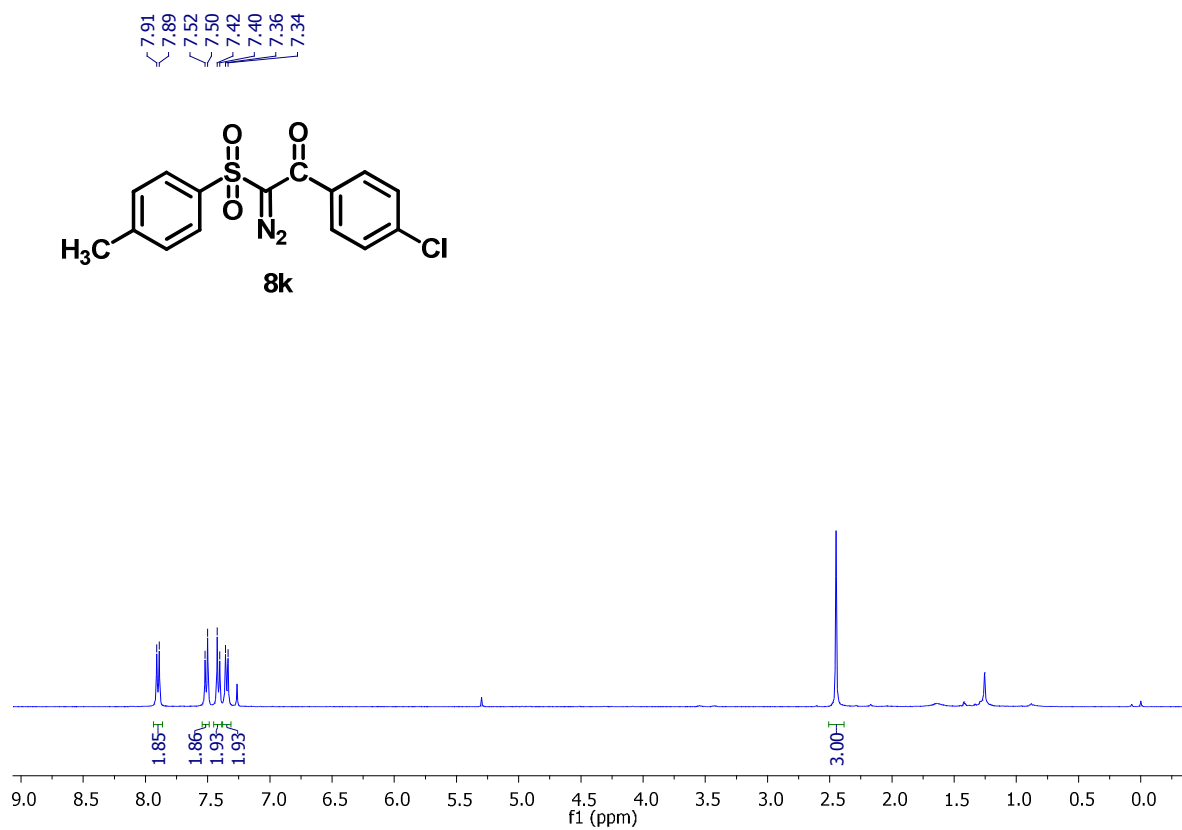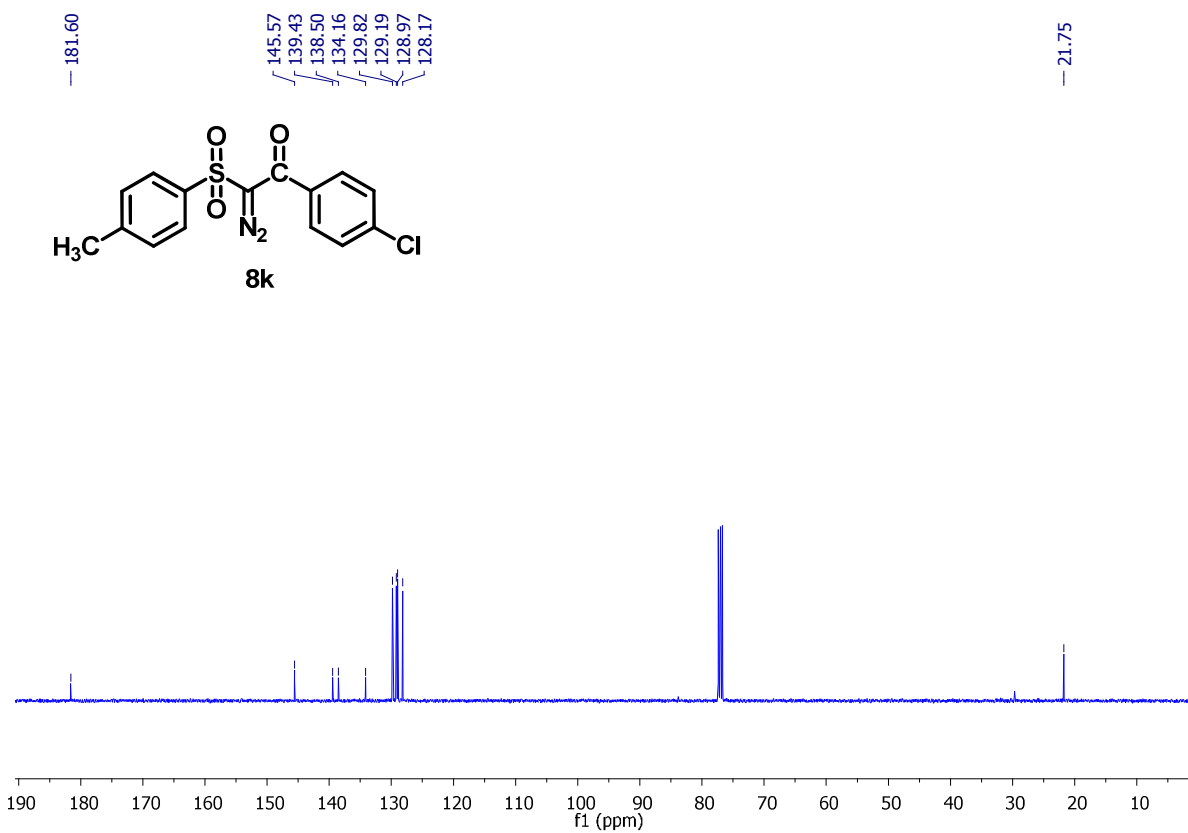

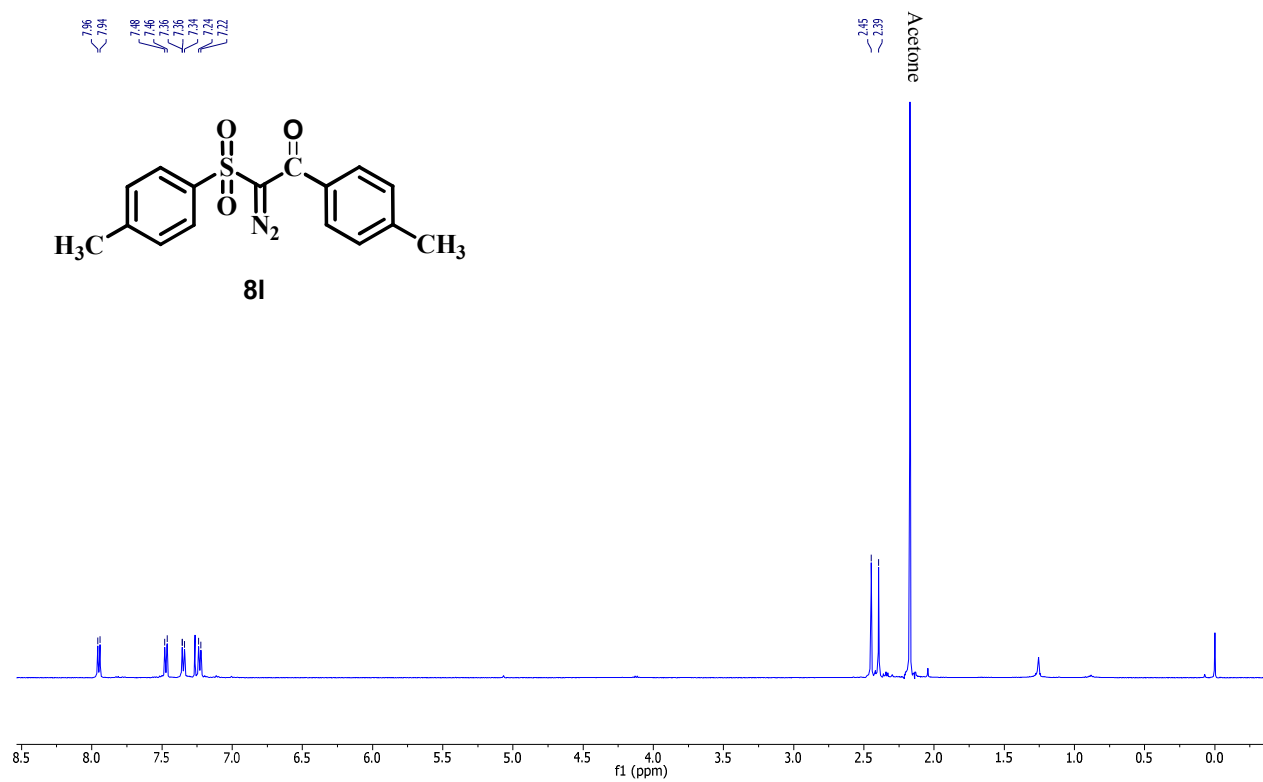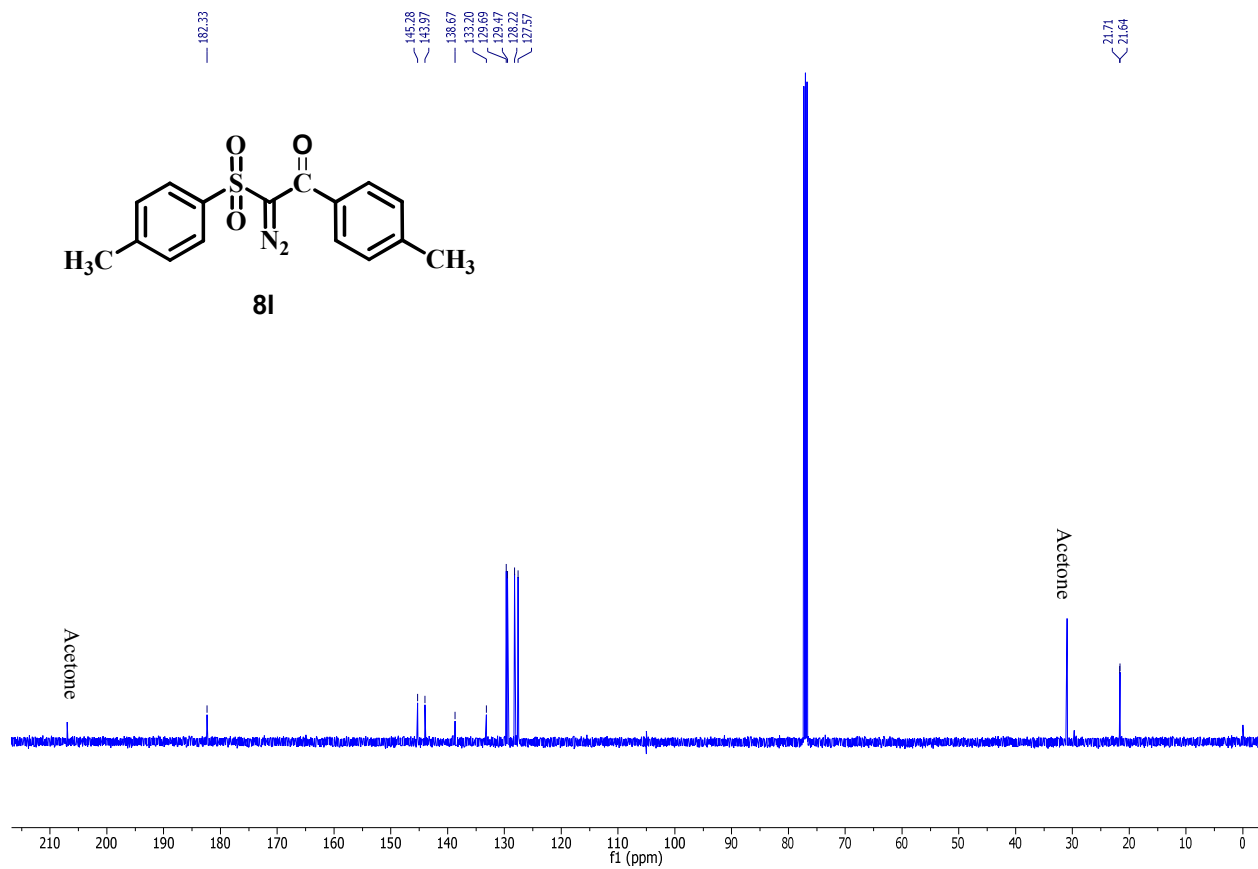

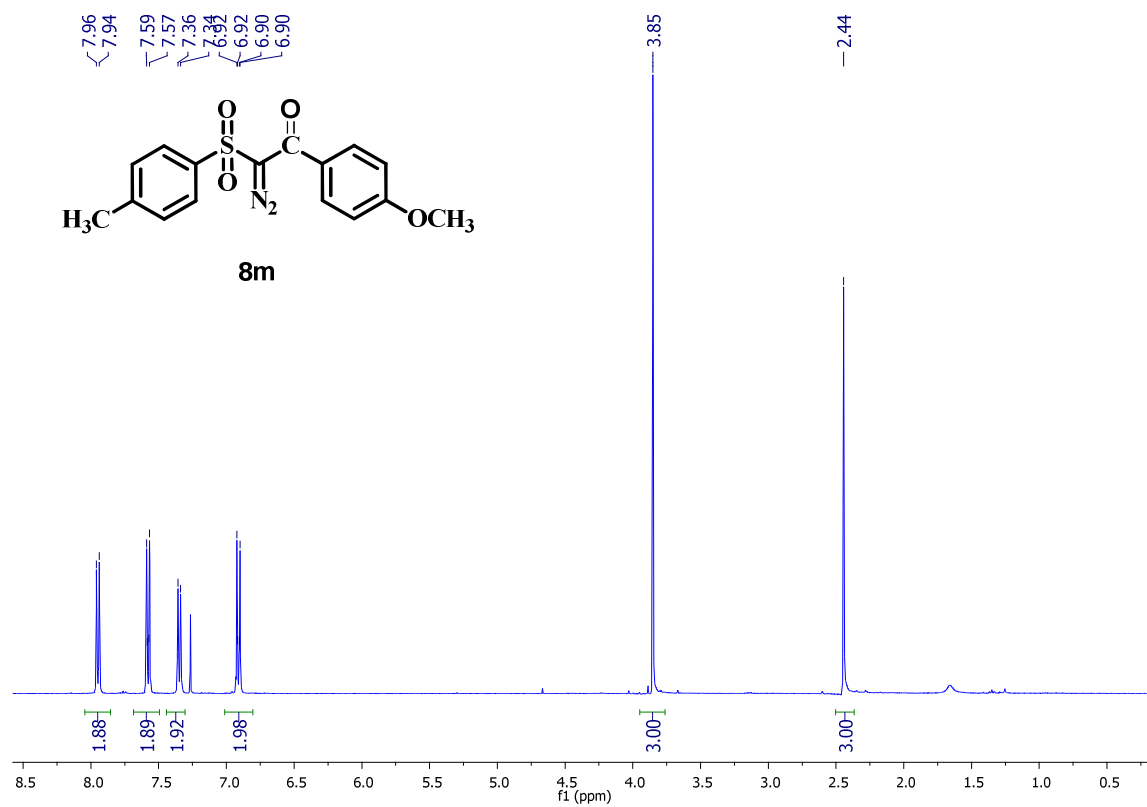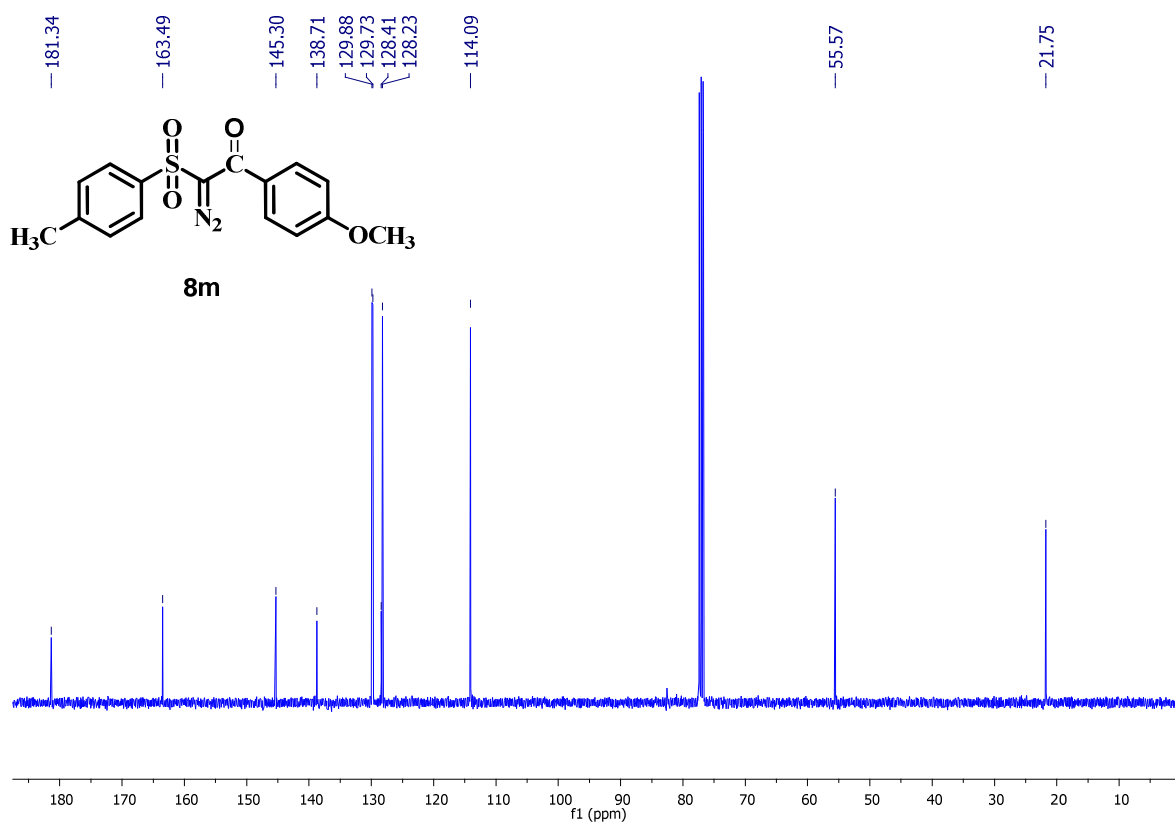



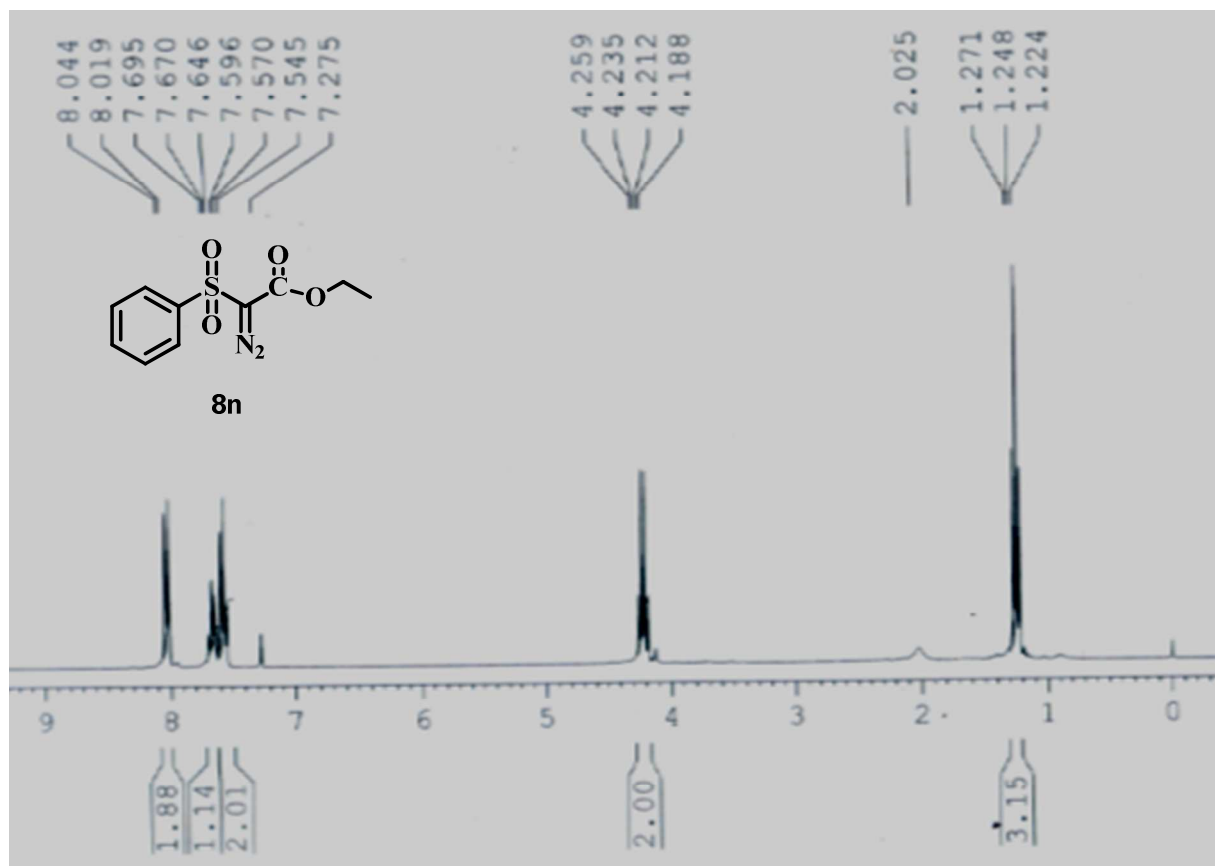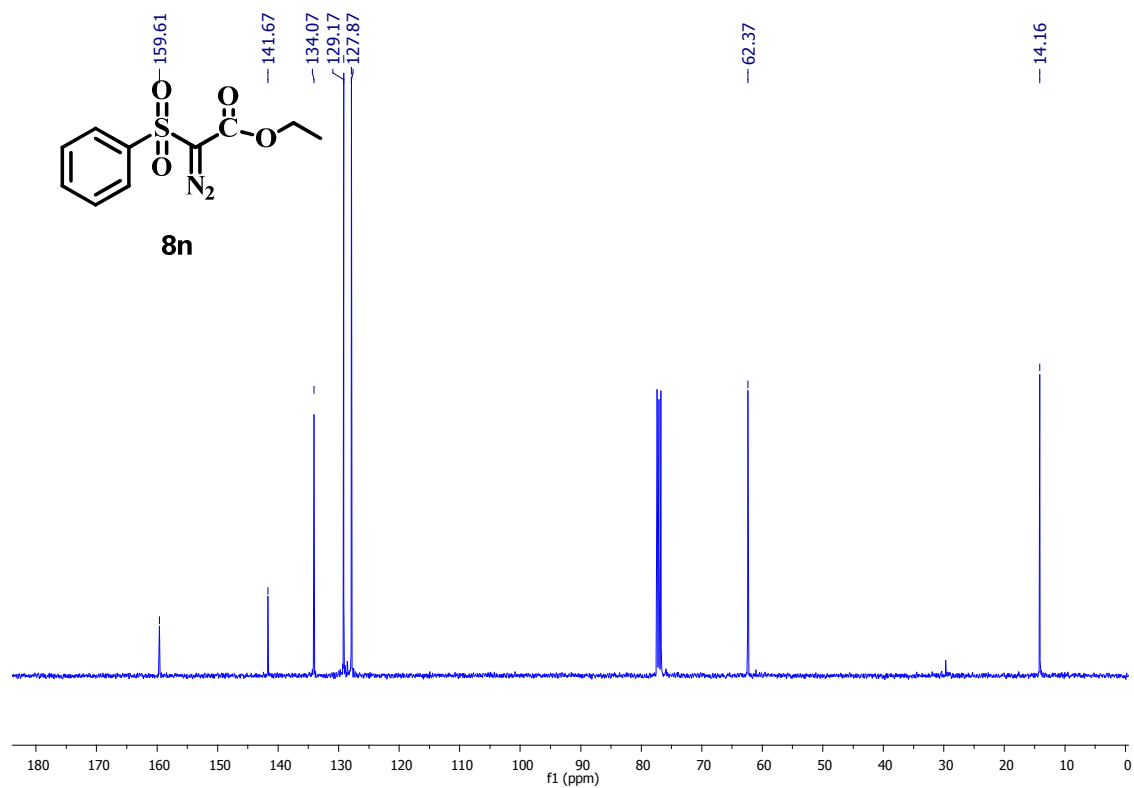

7.77  
7.76  
7.75  
7.75  
7.55  
7.54  
7.52  
7.52  
7.51  
7.46  
7.45  
7.44  
7.44  
7.43  
7.42  
7.42  
— 5.93

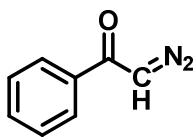

8o

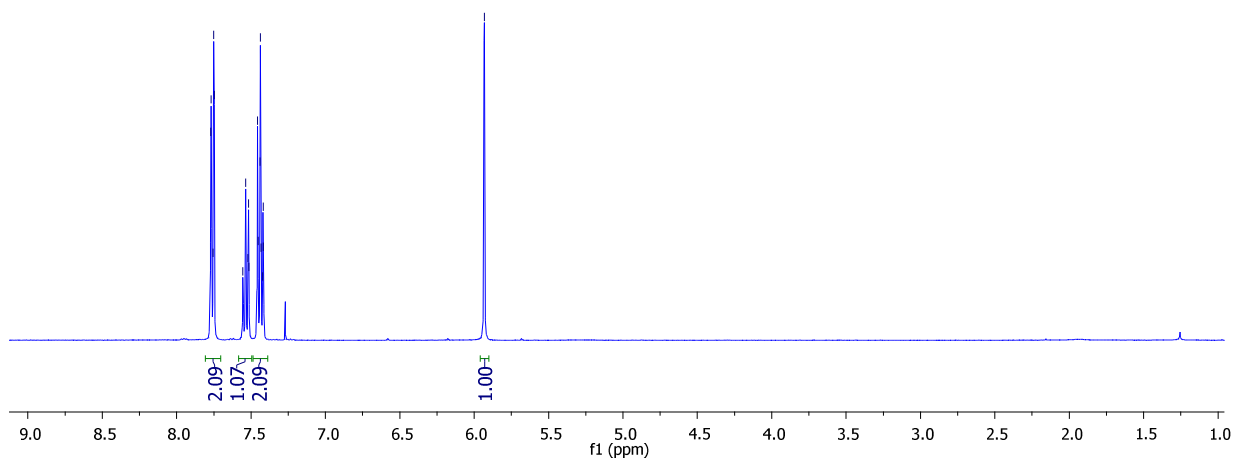

— 186.38

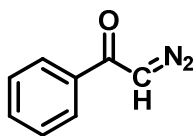

8o

136.64  
132.73  
128.67  
126.70

— 54.21

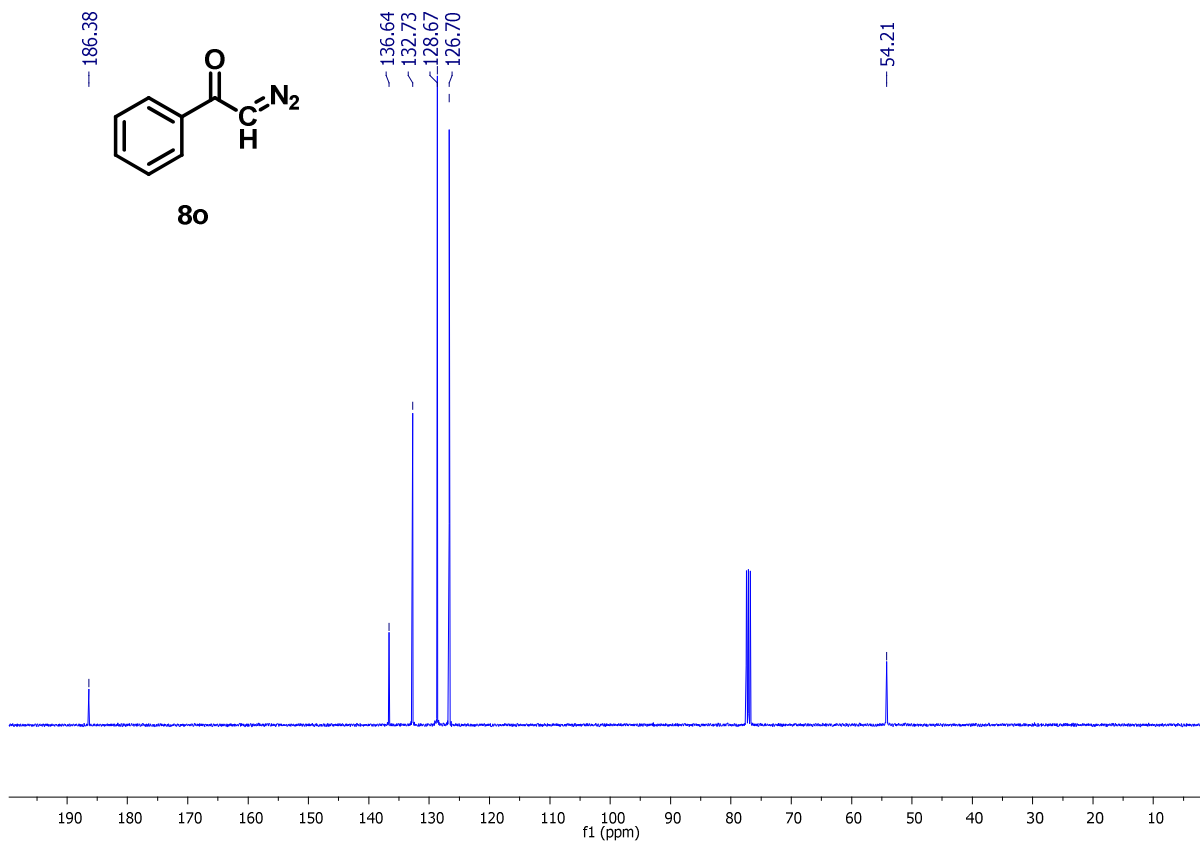

7.60  
7.59  
7.52  
7.51  
7.12  
7.11  
7.10

5.81

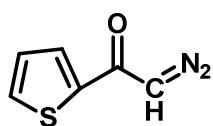

8p

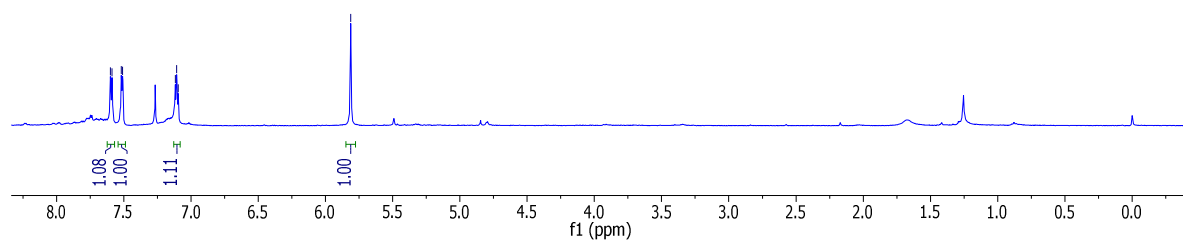

178.89

142.53

132.19  
129.03  
128.04

54.28

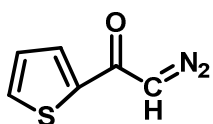

8p

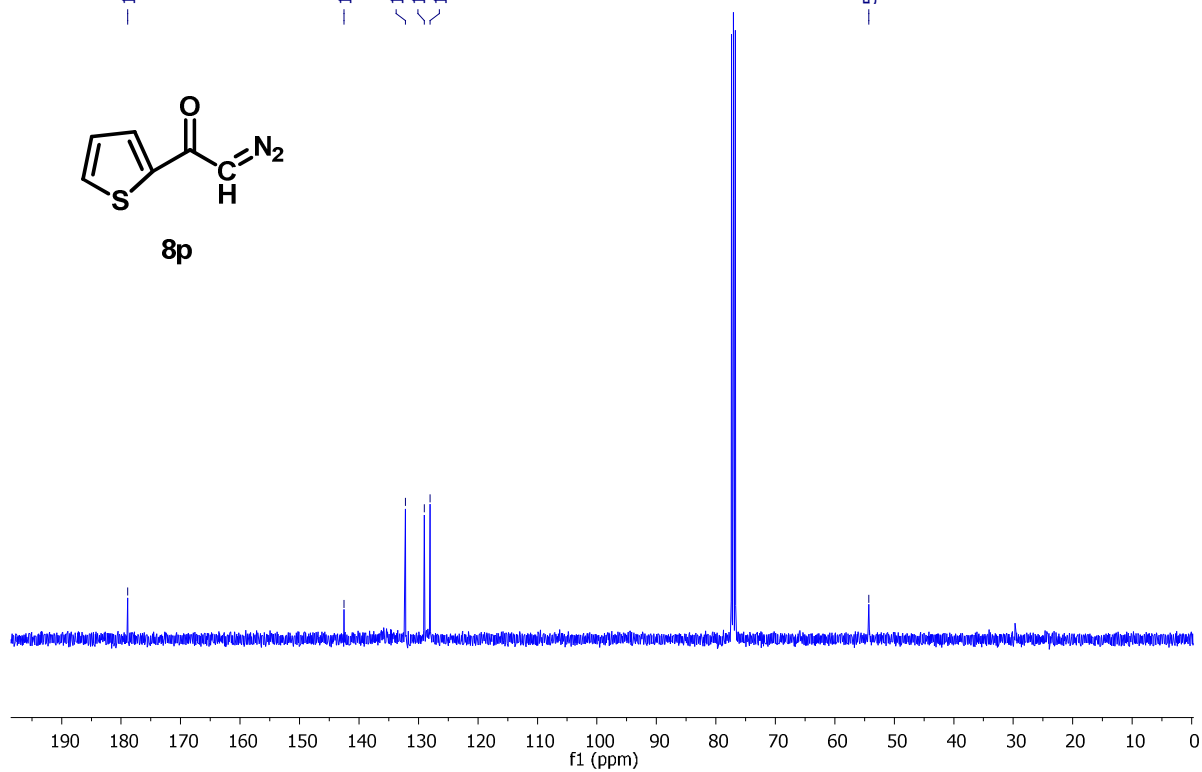

Supplement: Supplementary file 1 [file 4123291]
